# Supplementary material
Source: ML conference proceedings conference paper supplement (https://openaccess.thecvf.com/content/CVPR_2020/html/Li_Towards_Transferable_Targeted_CVPR_2020_paper.html)
Supplement: Supplementary file [file Li_Towards_Transferable_Targeted_CVPR_2020_supplemental.pdf]

# Towards Transferable Targeted Attack

Anonymous CVPR submission

Paper ID 4937

## Appendix

### A. Proof of Eq. 7

Denote  $o_i$  as the softmax input with  $C$  classes,  $p_i$  as corresponding output, then the derivative  $\frac{\partial p_i}{\partial o_i}$  of the output  $\mathbf{y}$  of the softmax function with respect to its input  $\mathbf{o}$  can be calculated as:

$$\frac{\partial y_i}{\partial o_j} = \frac{\frac{\partial e^{o_i}}{\sum_i e^{o_i}}}{\partial o_j} \quad (1)$$

denote  $\sum_i^C e^{o_i}$  as  $\Sigma_C$ . If  $i = j$ , we get:

$$\begin{aligned} \frac{\partial y_i}{\partial o_i} &= \frac{e^{o_i} \Sigma_C - e^{o_i} e^{o_i}}{\Sigma_C^2} \\ &= \frac{e^{o_i}}{\Sigma_C^2} (1 - e^{o_i}) \\ &= p_i (1 - p_i) \end{aligned} \quad (2)$$

else there has:

$$\frac{\partial y_i}{\partial o_j} = \frac{0 - e^{o_i} e^{o_j}}{\Sigma_C^2} = -\frac{e^{o_j}}{\Sigma_C} \frac{e^{o_i}}{\Sigma_C} = -p_i p_j \quad (3)$$

Let  $\xi(y, p) = -y \cdot \log(p)$  denote cross-entropy error function, and then The derivative  $\frac{\partial \xi}{\partial z_i}$  of the loss function with respect to the softmax input  $z_i$  can be calculated as:

$$\begin{aligned} \frac{\partial \xi}{\partial o_i} &= -\sum_{j=1}^C \frac{\partial y_j \log(p_j)}{\partial o_i} \\ &= -\sum_{j=1}^C y_j \frac{1}{p_i} \frac{\partial p_j}{\partial o_i} = -\frac{y_i}{p_i} \frac{\partial p_i}{\partial o_i} - \sum_{j \neq i}^C y_j \frac{\partial p_j}{\partial o_i} \\ &= -\frac{y_i}{p_i} p_i (1 - p_i) - \sum_{j \neq i}^C y_j (-p_i p_j) \\ &= -y_i (1 - p_i) + \sum_{j \neq i}^C y_j p_i = -y_i + p_i \sum_j^C y_j \\ &= p_i - y_i \end{aligned} \quad (4)$$

where  $\sum_j^C y_j = 1$  as  $y$  is one hot label.

### B. Additional Experiments

The results of ensemble networks (white-box setting) are shown in Section 4, and we will show more results of the proposed method on all the six models respectively (black-box setting for itself and white-box setting for the other five models) here. We adopt the same experimental setups with Section 4 including dataset, networks, and parameters. We also attack the adversarially trained models using our method. The results are shown in Table 1 for normally trained models which are hold-out, Table 2 for adversarially trained models. All of these results are conducted based on DI<sup>2</sup>-FGSM and TI-FGSM. For black-box setting, we can always get the best performance, and for white-box setting, we can get the best performance on most of the situations.

In addition, extensive experiments about the parameter  $\epsilon$  which means the maximum of the noise allowed to add are conducted to further evaluate the proposed method. In some sense, these results also give a series of basic references for targeted attack and non-targeted attack on the six models with different  $\epsilon$ . The results are shown in Table 3 for ensemble models (white-box setting) with different  $\epsilon$ , and Table 4 for hold-out models (black-box setting) with different  $\epsilon$ . For black-box setting, we can always do the best. And for white-box setting, when  $\epsilon$  is small, we can get higher performance than the baseline, and as  $\epsilon$  gets bigger and bigger, the gap between baseline and our method becomes smaller and smaller because the success rates of attack is tending to 100% and there is little space for performance improvement.

| Attack                | -Inc-v3     | -Inc-v4     | -IncRes-v2  | -Res-50     | -Res-101    | -Res-152    |
|-----------------------|-------------|-------------|-------------|-------------|-------------|-------------|
| MI-FGSM               | 11.9        | 9.0         | 8.4         | 16.3        | 20.1        | 19.6        |
| DI <sup>2</sup> -FGSM | 28.0        | 26.8        | 25.9        | 29.5        | 32.1        | 32.6        |
| Ours                  | 37.0        | 32.6        | 30.6        | 36.0        | 39.7        | 39.6        |
| Ours+Trip             | <b>38.3</b> | <b>36.6</b> | <b>32.0</b> | <b>38.5</b> | <b>41.2</b> | <b>40.6</b> |
| TI-FGSM               | 29.8        | 27.5        | 28.8        | 29.6        | 33.7        | 34.4        |
| Ours                  | 39.3        | 36.3        | 34.6        | 37.5        | 40.8        | 41.3        |
| Ours+Trip             | <b>39.5</b> | <b>36.6</b> | <b>35.1</b> | <b>39.3</b> | <b>43.0</b> | <b>42.9</b> |

Table 1. The success rates (%) of adversarial attacks compared to MI-FGSM, DI<sup>2</sup>-FGSM and TI-FGSM on six respective hold-out models—Inc-v3, Inc-v4, IncRes-v2, Res-50, Res-101, and Res-152, in other words, for black-box setting. The adversarial examples are crafted from ensemble networks using the six models except the hold-out one. The sign “-” indicates the hold-out network.

| Model            | Attack                | Inc-v3<br>ens3 | Inc-v3<br>ens4 | IncRes-<br>v2ens | Inc-v3      | Inc-v4      | IncRes-v2   | Res-50      | Res-101     | Res-152     |
|------------------|-----------------------|----------------|----------------|------------------|-------------|-------------|-------------|-------------|-------------|-------------|
| Inc-v3<br>ens3   | DI <sup>2</sup> -FGSM | 0.7*           | <b>66.0</b>    | <b>37.2</b>      | 79.8        | 70.9        | 66.5        | 56.9        | 62.4        | 61.1        |
|                  | Ours                  | 1.1*           | 64.1           | 28.9             | <b>92.4</b> | 83.1        | 73.8        | 73.0        | <b>77.6</b> | 76.1        |
|                  | Ours+Trip             | <b>1.2*</b>    | 65.9           | 26.2             | 91.8        | <b>85.4</b> | <b>77.0</b> | <b>75.6</b> | 76.6        | <b>76.7</b> |
|                  | TI-FGSM               | 13.7*          | 55.7           | <b>39.0</b>      | 88.5        | 79.5        | 76.1        | 65.3        | 69.1        | 67.2        |
|                  | Ours                  | 17.7*          | <b>59.2</b>    | 27.4             | 94.0        | <b>88.0</b> | 81.2        | 78.0        | <b>82.6</b> | 80.4        |
|                  | Ours+Trip             | <b>18.1*</b>   | 55.7           | 30.0             | <b>94.1</b> | 86.8        | <b>83.2</b> | <b>79.4</b> | 80.5        | <b>81.5</b> |
| Inc-v3<br>ens4   | DI <sup>2</sup> -FGSM | 64.8           | 1.1*           | <b>39.8</b>      | 75.9        | 66.3        | 61.9        | 54.6        | 57.7        | 57.0        |
|                  | Ours                  | 66.8           | <b>1.5*</b>    | 27.7             | 90.7        | 79.5        | 73.0        | 71.2        | 74.9        | 74.7        |
|                  | Ours+Trip             | <b>67.0</b>    | <b>1.5*</b>    | 30.8             | <b>92.5</b> | <b>81.7</b> | <b>74.5</b> | <b>72.4</b> | <b>75.1</b> | <b>75.4</b> |
|                  | TI-FGSM               | 58.4           | 10.4*          | <b>37.9</b>      | 84.6        | 77.2        | 74.9        | 64.9        | 67.2        | 67.2        |
|                  | Ours                  | 62.1           | 12.9*          | 23.7             | 94.0        | 87.0        | 81.5        | 77.1        | 81.3        | 79.4        |
|                  | Ours+Trip             | <b>62.6</b>    | <b>14.6*</b>   | 27.0             | <b>94.7</b> | <b>87.9</b> | <b>82.3</b> | <b>77.7</b> | <b>81.7</b> | <b>81.6</b> |
| IncRes-<br>v2ens | DI <sup>2</sup> -FGSM | 61.2           | <b>62.9</b>    | 0.5*             | 75.3        | 65.4        | 60.2        | 53.3        | 57.5        | 55.8        |
|                  | Ours                  | <b>62.3</b>    | 61.3           | 1.0*             | 89.0        | 78.3        | 70.5        | 67.6        | 73.0        | 71.8        |
|                  | Ours+Trip             | 60.4           | 62.7           | <b>1.2*</b>      | <b>90.1</b> | <b>78.8</b> | <b>72.1</b> | <b>71.1</b> | <b>74.5</b> | <b>74.2</b> |
|                  | TI-FGSM               | 58.2           | 55.5           | 6.1*             | 83.8        | 77.7        | 73.8        | 65.9        | 69.9        | 67.4        |
|                  | Ours                  | 61.0           | <b>57.0</b>    | 7.7*             | <b>94.3</b> | <b>87.1</b> | 80.0        | 76.1        | 78.8        | <b>79.9</b> |
|                  | Ours+Trip             | <b>61.9</b>    | 56.6           | <b>8.4*</b>      | 93.6        | 86.7        | <b>80.9</b> | <b>76.9</b> | <b>81.3</b> | 79.5        |

Table 2. The success rates (%) of adversarial attacks compared to DI<sup>2</sup>-FGSM and TI-FGSM against three adversarially trained models—Inc-v3ens3, Inc-v3ens4, and IncRes-v2ens, and six normally trained models—Inc-v3, Inc-v4, IncRes-v2, Res-50, Res-101, and Res-152. The adversarial examples are crafted from ensemble networks and for the three adversarially trained models in the first column respectively, the sign “\*” indicates the black-box setting.

| Ensemble  |           | max-epsilion |             |             |             |             |             |             |             |             |             |             |             |             |
|-----------|-----------|--------------|-------------|-------------|-------------|-------------|-------------|-------------|-------------|-------------|-------------|-------------|-------------|-------------|
| Model     | Attack    | 8            | 10          | 12          | 14          | 16          | 18          | 20          | 22          | 24          | 26          | 28          | 30          | 32          |
| Inc-v3    | DI2-FGSM  | 60.2         | 70.8        | 77.8        | 82.9        | 86.7        | 91.1        | 92.1        | 93.1        | 95.3        | 96.7        | 96.4        | 97.0        | 97.9        |
|           | Ours      | 70.6         | 79.3        | 85.9        | <b>89.6</b> | <b>92.5</b> | 93.6        | 94.8        | <b>96.3</b> | 95.9        | 96.6        | <b>97.5</b> | <b>98.0</b> | 97.9        |
|           | Ours+Trip | <b>72.3</b>  | <b>81.0</b> | <b>86.0</b> | 88.8        | 91.7        | <b>94.0</b> | <b>94.9</b> | 95.4        | <b>96.8</b> | <b>97.0</b> | 97.1        | 97.4        | <b>98.0</b> |
|           | TI-FGSM   | 60.4         | 73.2        | 78.6        | 85.7        | 89.7        | 92.4        | 93.9        | <b>95.7</b> | <b>96.4</b> | <b>97.3</b> | 97.2        | <b>98.4</b> | <b>98.5</b> |
|           | Ours      | 69.5         | <b>79.2</b> | <b>85.6</b> | <b>89.9</b> | 91.2        | <b>93.4</b> | <b>94.7</b> | 95.3        | 96.3        | 97.2        | <b>97.4</b> | 97.4        | 98.0        |
|           | Ours+Trip | <b>69.8</b>  | 78.2        | 83.7        | 88.4        | <b>91.4</b> | 91.7        | 93.8        | 95.4        | 95.8        | 96.4        | <b>97.4</b> | 97.1        | 96.8        |
| Inc-v4    | DI2-FGSM  | 63.5         | 74.0        | 79.8        | 85.5        | 87.9        | 92.1        | 93.4        | 94.3        | 94.8        | 96.5        | 96.5        | 97.7        | <b>98.1</b> |
|           | Ours      | 72.1         | 80.6        | 86.5        | 89.3        | 91.5        | 93.0        | 94.2        | 94.9        | 96.1        | 96.8        | <b>97.5</b> | 97.6        | 97.1        |
|           | Ours+Trip | <b>73.5</b>  | <b>82.3</b> | <b>86.8</b> | <b>89.4</b> | <b>92.8</b> | <b>93.9</b> | <b>95.4</b> | <b>95.8</b> | <b>96.3</b> | <b>97.3</b> | 96.9        | <b>97.8</b> | 97.6        |
|           | TI-FGSM   | 62.0         | 70.8        | 79.7        | 85.1        | 87.7        | 92.1        | 93.1        | 94.3        | 95.5        | 96.5        | <b>96.9</b> | 97.2        | <b>97.7</b> |
|           | Ours      | 69.5         | 78.3        | 83.6        | <b>88.5</b> | 90.6        | 92.5        | 93.6        | <b>95.6</b> | <b>96.5</b> | 96.0        | 96.7        | <b>97.6</b> | 97.2        |
|           | Ours+Trip | <b>70.9</b>  | <b>80.9</b> | <b>86.8</b> | <b>88.5</b> | <b>91.7</b> | <b>93.0</b> | <b>94.9</b> | 95.3        | 96.1        | <b>96.8</b> | <b>96.9</b> | 97.2        | 97.5        |
| IncRes-v2 | DI2-FGSM  | 49.2         | 62.2        | 69.5        | 76.5        | 81.9        | 84.1        | 87.8        | 89.4        | 90.9        | 92.1        | 93.4        | 94.2        | <b>95.5</b> |
|           | Ours      | 57.9         | 68.4        | 77.7        | 80.7        | 84.3        | 87.8        | 89.2        | 90.8        | 90.4        | 93.6        | 94.0        | <b>94.7</b> | 94.9        |
|           | Ours+Trip | <b>63.3</b>  | <b>72.7</b> | <b>79.1</b> | <b>84.8</b> | <b>87.7</b> | <b>89.6</b> | <b>90.5</b> | <b>93.1</b> | <b>94.8</b> | <b>94.4</b> | <b>95.1</b> | <b>94.7</b> | 95.3        |
|           | TI-FGSM   | 62.3         | 72.6        | 79.9        | 85.6        | 88.9        | 90.8        | 92.5        | 95.2        | 95.4        | <b>96.8</b> | <b>97.0</b> | 97.3        | 97.2        |
|           | Ours      | 69.3         | 78.2        | 85.1        | 87.4        | 89.9        | 93.0        | <b>94.2</b> | 95.2        | 95.6        | <b>96.8</b> | 96.4        | <b>98.1</b> | <b>98.0</b> |
|           | Ours+Trip | <b>73.4</b>  | <b>81.3</b> | <b>86.4</b> | <b>89.8</b> | <b>91.4</b> | <b>93.6</b> | 94.1        | <b>95.4</b> | <b>96.1</b> | 94.9        | 96.9        | 97.7        | 97.3        |
| Res-50    | DI2-FGSM  | 51.4         | 64.3        | 74.2        | 80.3        | 84.2        | 86.8        | 88.1        | 90.8        | 91.6        | 93.3        | 94.1        | 94.1        | 95.4        |
|           | Ours      | 62.6         | 72.5        | 78.5        | 85.1        | 87.0        | 88.2        | 92.3        | 93.2        | 93.5        | 93.7        | 94.8        | 95.7        | 95.6        |
|           | Ours+Trip | <b>65.5</b>  | <b>76.9</b> | <b>82.1</b> | <b>85.5</b> | <b>88.8</b> | <b>90.2</b> | <b>93.5</b> | <b>93.8</b> | <b>94.7</b> | <b>94.9</b> | <b>96.2</b> | <b>96.8</b> | <b>95.9</b> |
|           | TI-FGSM   | 50.6         | 63.5        | 69.7        | 77.7        | 82.0        | 85.0        | 88.6        | 89.8        | 91.9        | 93.3        | 93.6        | 95.0        | 95.3        |
|           | Ours      | 59.5         | 69.4        | 76.9        | 82.2        | 85.0        | 88.8        | 90.1        | <b>92.2</b> | 92.8        | 94.2        | <b>94.4</b> | 94.3        | 95.6        |
|           | Ours+Trip | <b>62.5</b>  | <b>74.1</b> | <b>80.7</b> | <b>85.4</b> | <b>87.5</b> | <b>90.0</b> | <b>91.4</b> | 91.4        | <b>94.5</b> | <b>95.3</b> | 94.2        | <b>95.3</b> | <b>96.4</b> |
| Res-101   | DI2-FGSM  | 53.4         | 64.8        | 75.4        | 80.9        | 83.4        | 87.0        | 88.9        | 91.6        | 93.9        | 94.7        | 94.8        | 95.7        | 95.7        |
|           | Ours      | 62.5         | 73.2        | 80.0        | 84.3        | 86.6        | 89.7        | 91.7        | 93.2        | 93.8        | <b>94.9</b> | <b>95.9</b> | <b>95.9</b> | 96.4        |
|           | Ours+Trip | <b>68.3</b>  | <b>77.4</b> | <b>82.2</b> | <b>86.4</b> | <b>89.2</b> | <b>91.7</b> | <b>93.1</b> | <b>94.5</b> | <b>95.0</b> | 94.8        | 95.8        | 96.8        | <b>96.8</b> |
|           | TI-FGSM   | 52.9         | 64.6        | 72.0        | 78.3        | 82.3        | 85.9        | 89.0        | 90.5        | 93.1        | 93.2        | 93.8        | 94.6        | <b>96.4</b> |
|           | Ours      | 60.9         | 72.0        | 76.5        | 82.3        | 86.0        | 88.3        | 89.4        | 92.8        | 93.3        | 93.7        | 94.4        | 95.4        | 94.9        |
|           | Ours+Trip | <b>66.3</b>  | <b>74.4</b> | <b>79.7</b> | <b>83.9</b> | <b>87.7</b> | <b>89.3</b> | <b>92.1</b> | <b>93.2</b> | <b>94.5</b> | <b>95.0</b> | <b>94.9</b> | <b>95.9</b> | 95.8        |
| Res-152   | DI2-FGSM  | 55.3         | 69.5        | 78.1        | 82.1        | 85.3        | 89.7        | 91.6        | 92.3        | 93.8        | <b>95.4</b> | 95.5        | 96.5        | 95.7        |
|           | Ours      | 64.8         | 75.9        | 82.0        | 86.9        | 88.9        | 91.7        | 91.8        | 93.8        | <b>94.9</b> | 94.9        | 95.8        | <b>95.9</b> | <b>96.8</b> |
|           | Ours+Trip | <b>70.2</b>  | <b>79.3</b> | <b>84.5</b> | <b>89.0</b> | <b>91.4</b> | <b>92.0</b> | <b>94.2</b> | <b>94.7</b> | 94.8        | <b>95.4</b> | <b>96.2</b> | <b>95.9</b> | 96.7        |
|           | TI-FGSM   | 54.3         | 66.8        | 75.1        | 80.0        | 84.8        | 87.6        | 90.3        | 91.1        | 94.0        | 94.4        | <b>95.7</b> | 95.1        | 96.3        |
|           | Ours      | 61.2         | 73.9        | 80.2        | 83.7        | 87.1        | 90.1        | 90.9        | 93.3        | 93.7        | 94.9        | 95.6        | <b>96.2</b> | <b>96.8</b> |
|           | Ours+Trip | <b>66.8</b>  | <b>76.8</b> | <b>83.3</b> | <b>86.7</b> | <b>90.6</b> | <b>91.0</b> | <b>93.6</b> | <b>94.1</b> | <b>95.2</b> | <b>96.0</b> | <b>95.7</b> | 95.7        | 96.3        |

Table 3. The success rates (%) of adversarial attacks compared to DI<sup>2</sup>-FGSM and TI-FGSM against ensemble networks with different  $\epsilon$  which are ensembled from the five networks except the current network, all the results are in white-box setting.

| Hold-out  |           | max-epsion  |             |             |             |             |             |             |             |             |             |             |             |             |
|-----------|-----------|-------------|-------------|-------------|-------------|-------------|-------------|-------------|-------------|-------------|-------------|-------------|-------------|-------------|
| Model     | Attack    | 8           | 10          | 12          | 14          | 16          | 18          | 20          | 22          | 24          | 26          | 28          | 30          | 32          |
| Inc-v3    | DI2-FGSM  | 8.1         | 12.3        | 18.6        | 23.3        | 27.5        | 33.2        | 37.4        | 39.7        | 44.2        | 45.5        | 47.9        | 52.8        | 52.2        |
|           | Ours      | <b>12.9</b> | 19.2        | <b>27.1</b> | 31.5        | 37.7        | 41.4        | 46.1        | 47.8        | 51.7        | 54.5        | <b>57.6</b> | <b>59.5</b> | <b>60.1</b> |
|           | Ours+Trip | 12.3        | <b>20.6</b> | 26.3        | <b>32.8</b> | <b>38.4</b> | <b>43.7</b> | <b>47.0</b> | <b>49.9</b> | <b>53.8</b> | <b>55.9</b> | 55.2        | 58.6        | 59.1        |
|           | TI-FGSM   | 12.1        | 18.9        | 24.0        | 31.9        | 36.0        | 40.3        | 46.5        | 49.4        | 53.5        | 56.3        | 58.0        | 59.7        | 61.0        |
|           | Ours      | 11.7        | 19.3        | 27.3        | 32.7        | 37.4        | 40.8        | 45.8        | 49.4        | 52.6        | 54.2        | 56.6        | 58.6        | 59.4        |
|           | Ours+Trip | <b>13.9</b> | <b>20.7</b> | <b>29.0</b> | <b>34.5</b> | <b>40.1</b> | <b>44.6</b> | <b>48.4</b> | <b>51.8</b> | <b>53.9</b> | <b>57.3</b> | <b>59.3</b> | <b>62.7</b> | <b>63.7</b> |
| Inc-v4    | DI2-FGSM  | 8.1         | 11.7        | 17.9        | 20.8        | 26.1        | 30.4        | 35.9        | 38.1        | 41.5        | 42.5        | 46.0        | 50.6        | 50.8        |
|           | Ours      | 11.3        | 16.3        | 23.4        | <b>30.3</b> | 35.2        | 38.4        | 40.8        | 43.4        | <b>48.2</b> | 50.5        | 52.9        | 55.7        | 57.1        |
|           | Ours+Trip | <b>11.8</b> | <b>17.7</b> | <b>25.5</b> | 30.1        | <b>36.1</b> | <b>39.9</b> | <b>42.9</b> | <b>47.5</b> | 47.2        | <b>51.5</b> | <b>53.0</b> | <b>56.1</b> | <b>58.5</b> |
|           | TI-FGSM   | 7.5         | 13.2        | 19.4        | 24.0        | 26.5        | 33.5        | 37.5        | 41.7        | 45.8        | 47.8        | 51.4        | 52.6        | 56.2        |
|           | Ours      | 11.9        | 17.8        | 24.9        | 31.1        | 35.2        | 39.6        | 43.6        | 48.1        | <b>50.8</b> | 53.0        | 56.3        | 58.2        | 60.7        |
|           | Ours+Trip | <b>12.7</b> | <b>19.2</b> | <b>25.3</b> | <b>33.6</b> | <b>36.6</b> | <b>41.0</b> | <b>45.4</b> | <b>48.9</b> | 50.2        | <b>54.4</b> | <b>57.1</b> | <b>60.1</b> | <b>62.2</b> |
| IncRes-v2 | DI2-FGSM  | 7.1         | 11.6        | 18.0        | 22.5        | 27.4        | 32.0        | 35.5        | 37.1        | 42.9        | 42.9        | 46.9        | 50.2        | 49.7        |
|           | Ours      | 9.4         | 15.7        | 21.5        | 27.4        | 32.8        | 35.2        | 38.7        | 43.2        | 46.3        | 47.4        | 51.0        | 53.5        | 55.6        |
|           | Ours+Trip | <b>11.0</b> | <b>16.5</b> | <b>23.3</b> | <b>28.9</b> | <b>34.3</b> | <b>37.4</b> | <b>41.3</b> | <b>45.5</b> | <b>49.4</b> | <b>49.8</b> | <b>53.4</b> | <b>54.3</b> | <b>57.0</b> |
|           | TI-FGSM   | 7.7         | 13.6        | 19.3        | 25.3        | 29.2        | 34.2        | 37.1        | 41.6        | 43.8        | 48.6        | 51.2        | 54.6        | 54.7        |
|           | Ours      | 10.9        | 17.4        | <b>25.5</b> | 28.9        | 34.4        | 38.0        | 41.6        | 46.4        | 48.2        | 52.2        | 53.8        | 55.8        | 57.7        |
|           | Ours+Trip | <b>11.3</b> | <b>18.1</b> | 24.5        | <b>31.7</b> | <b>36.7</b> | <b>39.7</b> | <b>42.9</b> | <b>48.5</b> | <b>50.6</b> | <b>52.6</b> | <b>56.3</b> | <b>56.7</b> | <b>58.2</b> |
| Res-50    | DI2-FGSM  | 8.6         | 13.6        | 21.2        | 23.9        | 27.3        | 32.0        | 36.3        | 40.4        | 42.0        | 44.7        | 46.7        | 48.3        | 50.8        |
|           | Ours      | 14.2        | <b>22.5</b> | 28.1        | 32.6        | 37.1        | 40.9        | 44.6        | 47.8        | 49.9        | 53.1        | 56.0        | <b>56.9</b> | 57.7        |
|           | Ours+Trip | <b>15.6</b> | 21.7        | <b>28.7</b> | <b>34.4</b> | <b>37.3</b> | <b>42.7</b> | <b>45.1</b> | <b>48.8</b> | <b>50.9</b> | <b>53.3</b> | <b>56.2</b> | 56.0        | <b>58.2</b> |
|           | TI-FGSM   | 9.1         | 14.9        | 21.3        | 25.5        | 31.8        | 35.9        | 36.5        | 40.2        | 44.6        | 46.9        | 49.2        | 52.4        | 52.8        |
|           | Ours      | 15.1        | <b>22.3</b> | 28.5        | 34.9        | 38.4        | 42.2        | 45.8        | 49.9        | <b>52.1</b> | 54.0        | 55.6        | 57.5        | <b>59.7</b> |
|           | Ours+Trip | <b>16.3</b> | 21.7        | <b>28.6</b> | <b>35.0</b> | <b>39.4</b> | <b>45.1</b> | <b>47.6</b> | <b>51.0</b> | 51.6        | <b>54.2</b> | <b>56.3</b> | <b>57.7</b> | 58.9        |
| Res-101   | DI2-FGSM  | 8.9         | 14.7        | 21.4        | 27.1        | 31.7        | 36.8        | 40.3        | 44.5        | 47.3        | 50.0        | 53.8        | 55.1        | 57.6        |
|           | Ours      | 13.8        | 21.6        | 27.7        | <b>35.0</b> | <b>41.6</b> | 46.2        | 46.5        | 51.9        | 54.3        | <b>57.8</b> | <b>59.7</b> | <b>60.2</b> | <b>62.4</b> |
|           | Ours+Trip | <b>15.2</b> | <b>23.0</b> | <b>28.8</b> | <b>35.0</b> | 40.4        | <b>46.4</b> | <b>49.6</b> | <b>52.8</b> | <b>55.1</b> | 56.0        | 58.3        | <b>60.2</b> | 61.3        |
|           | TI-FGSM   | 10.2        | 16.1        | 22.7        | 28.9        | 35.2        | 39.2        | 42.8        | 45.1        | 49.7        | 52.5        | 55.3        | 58.2        | 60.4        |
|           | Ours      | 15.1        | <b>23.9</b> | 30.2        | 36.6        | 41.6        | <b>45.1</b> | 48.4        | <b>54.3</b> | 55.3        | 58.4        | 59.7        | <b>62.8</b> | 63.2        |
|           | Ours+Trip | <b>16.4</b> | 23.8        | <b>30.5</b> | <b>37.5</b> | <b>41.7</b> | 44.6        | <b>51.2</b> | 53.1        | <b>56.2</b> | <b>59.5</b> | <b>62.0</b> | 62.0        | <b>64.9</b> |
| Res-152   | DI2-FGSM  | 11.0        | 17.0        | 23.6        | 28.6        | 33.5        | 37.2        | 41.8        | 45.3        | 48.5        | 51.1        | 53.0        | 56.2        | 56.6        |
|           | Ours      | 16.0        | 21.6        | 27.8        | <b>35.6</b> | 39.9        | 45.3        | 47.5        | 50.4        | <b>55.3</b> | 55.5        | 57.3        | <b>60.2</b> | <b>61.4</b> |
|           | Ours+Trip | <b>16.8</b> | <b>23.8</b> | <b>30.4</b> | 35.1        | <b>41.0</b> | <b>45.7</b> | <b>48.7</b> | <b>51.3</b> | 53.8        | <b>56.9</b> | <b>58.2</b> | <b>60.2</b> | 61.0        |
|           | TI-FGSM   | 11.0        | 17.7        | 24.2        | 28.6        | 35.7        | 39.3        | 44.2        | 47.1        | 51.4        | 55.0        | 57.8        | 57.7        | 60.1        |
|           | Ours      | 15.3        | 24.1        | 29.9        | <b>36.4</b> | <b>42.2</b> | 44.6        | <b>50.7</b> | <b>54.0</b> | 55.0        | <b>57.3</b> | <b>61.0</b> | 61.5        | <b>63.8</b> |
|           | Ours+Trip | <b>16.3</b> | <b>25.0</b> | <b>32.6</b> | 36.0        | 42.1        | <b>47.3</b> | 50.0        | 52.3        | <b>55.2</b> | 56.9        | 57.6        | <b>61.6</b> | 63.1        |

Table 4. The success rates (%) of adversarial attacks compared to DI<sup>2</sup>-FGSM and TI-FGSM against six normally trained models—Inc-v3, Inc-v4, IncRes-v2, Res-50, Res-101, and Res-152 with different  $\epsilon$ . The adversarial examples are crafted from ensemble networks. All the results are in black-box setting.
